# Supplementary material
Source: Springer Nature journal article supplement (https://www.springermedizin.de/resource/supplementary/13030_2010_76_MOESM2_ESM.pdf/9644682)
Supplement: MOESM2 [file 9644682]

*Mental risk = Severity × Frequency × Possibility*
